# Supplementary material for: Stability and conformation of the dimeric HIV-1 genomic RNA 5′UTR
Source: PubMed Central journal article supplement — Biophys J. 2021 Sep 14;120(21):4874–90. doi: 10.1016/j.bpj.2021.09.017 (PMC8595565; doi:10.1016/j.bpj.2021.09.017), 2021-09-14
Supplement: mmc1.pdf [file mmc1.pdf]

**Biophysical Journal, Volume 120**

**Supplemental information**

**Stability and conformation of the dimeric HIV-1 genomic RNA 5'UTR**

**Robert J. Blakemore, Cleo Burnett, Canessa Swanson, Siarhei Kharytonchyk, Alice Telesnitsky, and James B. Munro**

# Stability and conformation of the dimeric HIV-1 genomic RNA 5'UTR

Robert J. Blakemore<sup>1,2</sup>, Cleo Burnett<sup>3</sup>, Canessa Swanson<sup>4</sup>, Siarhei Kharytonchyk<sup>3</sup>, Alice Telesnitsky<sup>3</sup>, and James B. Munro<sup>1,5,6\*</sup>

<sup>1</sup>Department of Molecular Biology and Microbiology, Tufts University School of Medicine and School of Graduate Biomedical Sciences, Boston, MA, 02111, USA

<sup>2</sup>Graduate Program in Molecular Microbiology, Tufts University Graduate School of Biomedical Sciences, Boston, MA, 02111, USA

<sup>3</sup>Department of Microbiology and Immunology, University of Michigan Medical School, Ann Arbor, MI, 48109, USA

<sup>4</sup>Department of Chemistry and Biochemistry, University of Maryland Baltimore Country, Baltimore, MD, 21250, USA

<sup>5</sup>Department of Microbiology and Physiological Systems, University of Massachusetts Medical School, Worcester, MA, 01605, USA

<sup>6</sup>Department of Biochemistry and Molecules Pharmacology, University of Massachusetts Medical School, Worcester, MA, 01605, USA

\*To whom correspondence should be addressed. Tel: +1 (774) 455-4754; Fax: +1 (508) 856-5920; Email: james.munro@umassmed.edu

## Supporting Material

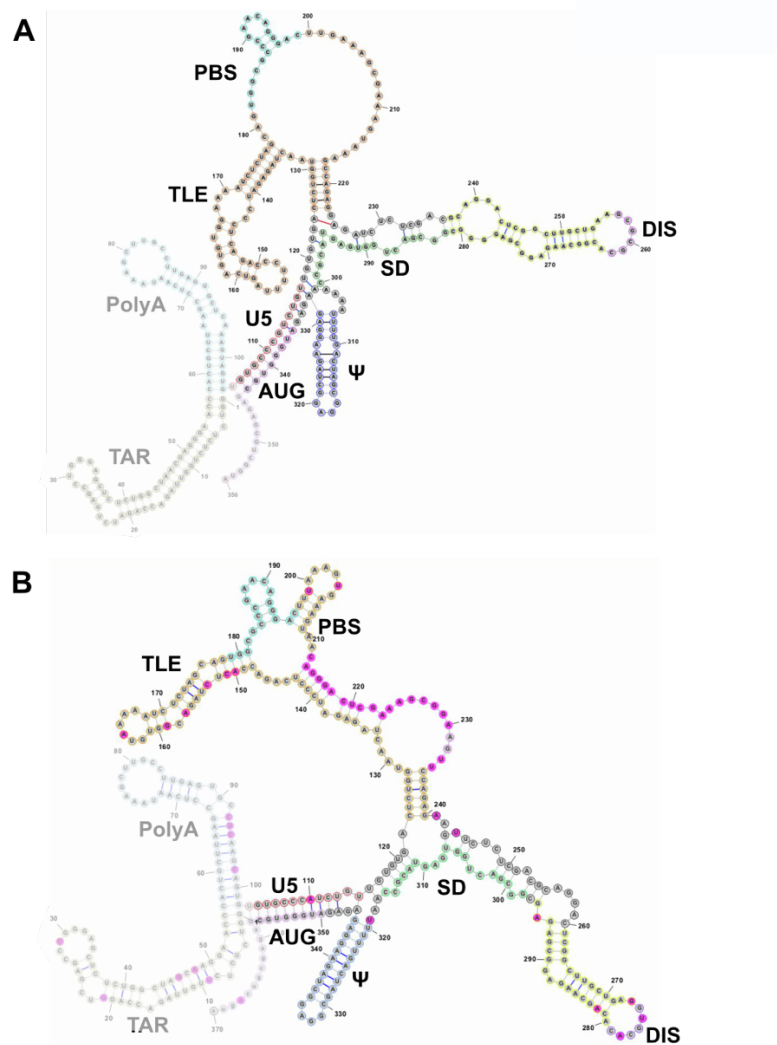

**Fig. S1. Secondary structural models of the NL4.3-5'UTR and MAL-5'UTR.** (A) Secondary structural model of the NL4.3-5'UTR with functional elements indicated: TAR, trans-acting response element; PolyA, polyadenylation signal; U5, unique 5' sequence; TLE, tRNA-like element; PBS, primer-binding site; DIS, dimerization initiation sequence; SD, splice donor; Ψ site; AUG, translation start site. The shaded sequence, containing TAR, PolyA, and a segment of the AUG hairpin, are not present in the NL4.3-5'UTR<sup>238</sup> RNA construct studied here. (B) Secondary structural model of the MAL-5'UTR with functional elements indicated as in (A). Nucleotides highlighted in pink are distinct from NL4.3-5'UTR.

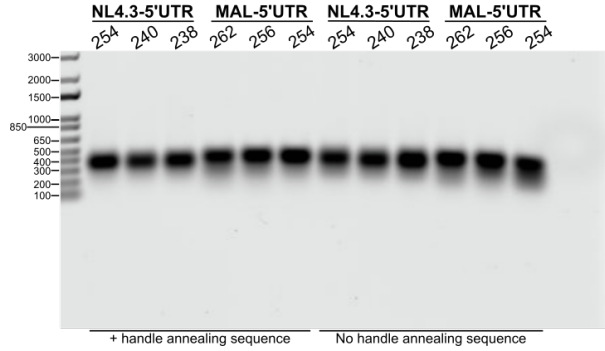

**Fig. S2. Evaluation of RNA with denaturing gel electrophoresis.** Purified *in-vitro* transcribed RNA was run on a denaturing 1% agarose gel in TAE with 1% bleach to evaluate purity. NL4.3-5'UTR<sup>238</sup> and MAL-5'UTR<sup>254</sup>, with and without the handle annealing sequence, were used in the present study.

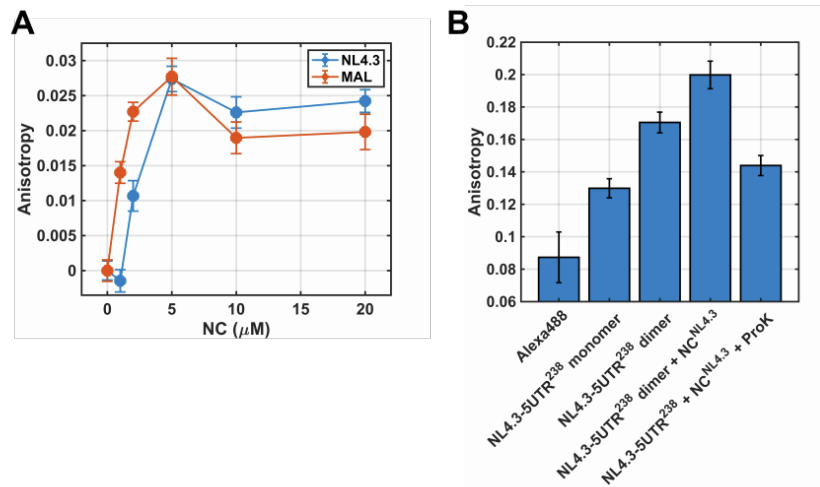

**Fig. S3. Verification of NC binding to 5'UTR RNA with fluorescence anisotropy. (A)** Steady-state fluorescence anisotropy acquired with NL4.3-5'UTR<sup>238</sup> (blue) and MAL-5'UTR<sup>254</sup> (orange) labeled with Alexa488 at the 3' terminus. 5'UTR RNA was dimerized in PI buffer at 1 mM Mg<sup>2+</sup> for 1 hr at 37°C in the presence of varying concentrations of cognate NC protein (NC<sup>NL4.3</sup> or NC<sup>MAL</sup>). Data are presented as the average change in anisotropy over three measurements with error bars reflecting the standard error. **(B)** Anisotropy of Alexa488-labeled NL4.3-5'UTR<sup>238</sup> dimerized in the absence and presence of NC<sup>NL4.3</sup>, and after removal of NC<sup>NL4.3</sup> with proteinase K (ProK). Data are presented as the average of three measurements with error bars reflecting the standard error.

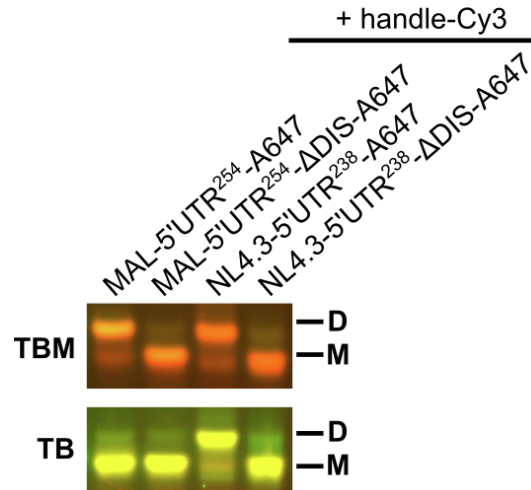

**Fig. S4. Dimerization of fluorescently labeled 5'UTRs.** Analysis of 5'UTR dimer stability with non-denaturing RNA gel electrophoresis. The indicated Alexa647-labeled RNA constructs were dimerized in the presence of the Cy3-labeled DNA oligonucleotide handle in PI buffer for 1 hr at 37°C, followed by evaluation on 1% agarose gels in TB or TBM buffers. Gels were imaged on a fluorescent gel scanner. Monomer (M) and dimer (D) species are indicated. In the NL4.3-5'UTR<sup>238</sup> construct, the  $\Delta$ DIS mutant contains a GAGA tetraloop in place of the DIS loop (44).

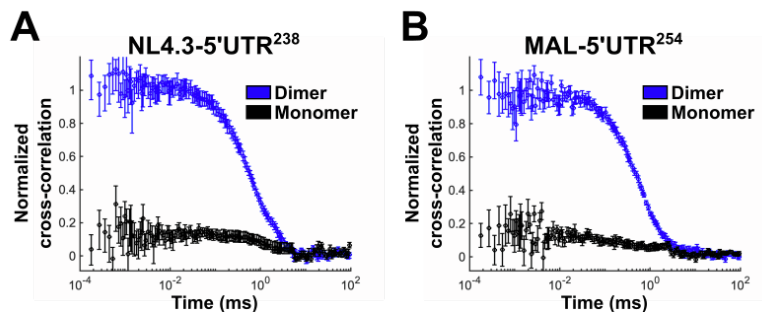

**Fig. S5. Monomeric 5'UTR does not contribute to the FCCS measurement.** (A) CC data for dimerized (blue) and monomeric (black) NL4.3-5'UTR<sup>238</sup>. A 1:1 molar ratio of NL4.3-5'UTR<sup>238</sup> labeled with either Alexa488 or Alexa647 was evaluated by FCCS before (monomeric) or after (dimeric) 1 hr incubation in PI buffer at 37°C. Only dimerized RNA leads to non-zero CC, consistent with diffusing complexes containing both fluorophores. (B) The same data for MAL-5'UTR<sup>254</sup>. Here again, only dimerized RNA leads to non-zero CC. In both panels the data are presented as the average normalized CC from 10 measurements of 10 s duration each. Error bars reflect the standard error.

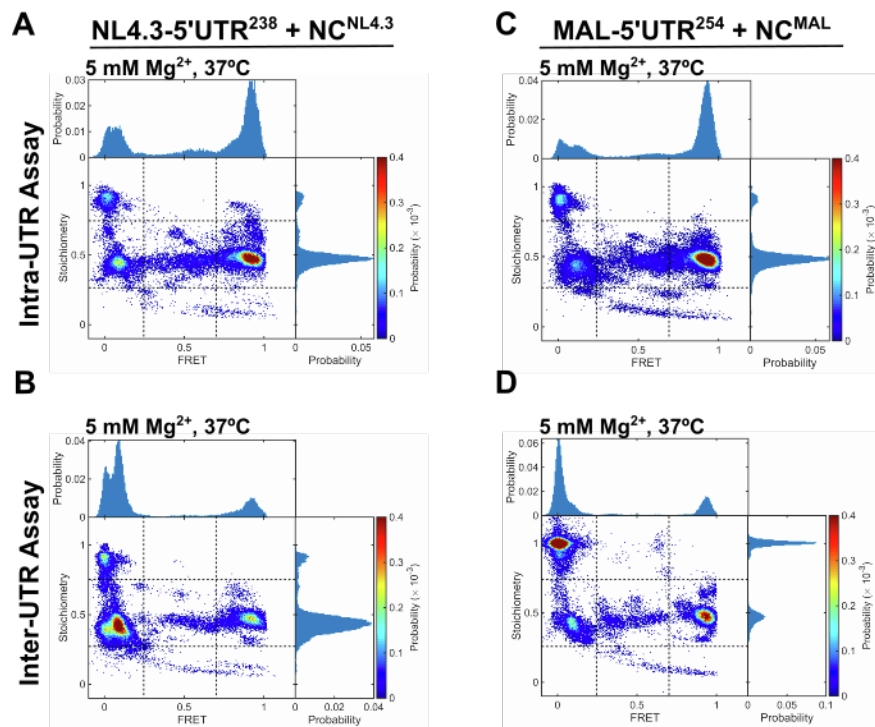

**Fig. S6. smFRET analysis of the 5'UTR dimers formed at elevated Mg<sup>2+</sup> concentration.** All samples were dimerized in PI buffer at 5 mM Mg<sup>2+</sup> in the presence of cognate NC for 1 hr at 37°C. Samples were imaged in the same buffer at room temperature. Bivariate ES plots and univariate histograms displaying the distributions of FRET efficiency and stoichiometry are presented as in **Figs. 6** and **8**. Data are shown for the NL4.3-5'UTR<sup>238</sup> dimer acquired with the **(A)** Intra-UTR FRET Assay and the **(B)** Inter-UTR FRET Assay. Also shown are **(C)** Intra-UTR FRET data and **(D)** Inter-UTR FRET data for MAL-5'UTR<sup>254</sup> dimers.

|                                                   |            | Intra-UTR Assay            |                          |            | Inter-UTR Assay            |                          |
|---------------------------------------------------|------------|----------------------------|--------------------------|------------|----------------------------|--------------------------|
|                                                   |            | NL4.3-5'UTR <sup>238</sup> | MAL-5'UTR <sup>254</sup> |            | NL4.3-5'UTR <sup>238</sup> | MAL-5'UTR <sup>254</sup> |
| 1 mM Mg <sup>2+</sup> , 37°C                      | DCM/KD     | 61%                        | 48%                      | KD         | 58%                        | 4%                       |
|                                                   | ED         | 18%                        | 24%                      | ED         | 29%                        | 15%                      |
|                                                   | Donor only | 15%                        | 17%                      | Donor only | 11%                        | 79%                      |
|                                                   | NA         | 6%                         | 11%                      | NA         | 2%                         | 2%                       |
| 5 mM Mg <sup>2+</sup> , 37°C                      | DCM/KD     | 69%                        | 64%                      | KD         | 65%                        | 11%                      |
|                                                   | ED         | 18%                        | 21%                      | ED         | 20%                        | 16%                      |
|                                                   | Donor only | 9%                         | 9%                       | Donor only | 14%                        | 71%                      |
|                                                   | NA         | 4%                         | 7%                       | NA         | <1%                        | 2%                       |
| 1 mM Mg <sup>2+</sup> , 57°C                      | DCM/KD     | 13%                        | 59%                      | KD         | 30%                        | 9%                       |
|                                                   | ED         | 69%                        | 26%                      | ED         | 51%                        | 16%                      |
|                                                   | Donor only | 15%                        | 8%                       | Donor only | 13%                        | 72%                      |
|                                                   | NA         | 3%                         | 7%                       | NA         | 6%                         | 3%                       |
| 1 mM Mg <sup>2+</sup> , 37°C, NC <sup>NL4.3</sup> | DCM/KD     | 17%                        | 21%                      | KD         | 21%                        | 20%                      |
|                                                   | ED         | 73%                        | 71%                      | ED         | 60%                        | 69%                      |
|                                                   | Donor only | 9%                         | 5%                       | Donor only | 12%                        | 4%                       |
|                                                   | NA         | 1%                         | 2%                       | NA         | 7%                         | 7%                       |
| 5 mM Mg <sup>2+</sup> , 37°C, NC <sup>NL4.3</sup> | DCM/KD     | 60%                        | 68%                      | KD         | 63%                        | 14%                      |
|                                                   | ED         | 22%                        | 17%                      | ED         | 24%                        | 22%                      |
|                                                   | Donor only | 10%                        | 10%                      | Donor only | 11%                        | 61%                      |
|                                                   | NA         | 8%                         | 6%                       | NA         | 3%                         | 3%                       |
| 1 mM Mg <sup>2+</sup> , 37°C, 10 μM Neo           | DCM/KD     |                            | 66%                      | KD         |                            | 79%                      |
|                                                   | ED         |                            | 17%                      | ED         |                            | 13%                      |
|                                                   | Donor only |                            | 10%                      | Donor only |                            | 5%                       |
|                                                   | NA         |                            | 6%                       | NA         |                            | 4%                       |

Table S1. Summary of 5'UTR conformation occupancies determined through the Intra- and Inter-UTR smFRET Assays.
